# Supplementary material for: Cellulose supported cuprous iodide nanoparticles (Cell-CuI NPs): a new heterogeneous and recyclable catalyst for the one pot synthesis of 1,4-disubstituted – 1,2,3-triazoles in water
Source: Royal Society of Chemistry journal article supplement (doi:10.1039/c4ra05080k), 2014-09-10

**Cellulose Supported Cuprous Iodide Nanoparticles (Cell-CuI NPs): Novel, Heterogeneous and Recyclable catalyst for Multicomponent Synthesis of 1, 4 - Disubstituted - 1, 2, 3-Triazoles in Water Medium**

Pramod V. Chavan,<sup>a</sup> Kapil S. Pandit,<sup>a</sup> Makarand A. Kulkarni,<sup>a</sup> Uday V. Desai,<sup>\*a</sup>  
Prakash P. Wadgaonkar<sup>b</sup>

*a: Department of Chemistry, Shivaji University, Kolhapur – 416 004; India.*

*b: Polymer Science and Engineering Division, CSIR National Chemical Laboratory, Pune - 411 008, India.*

e-mail: [uvdchem2011@gmail.com](mailto:uvdchem2011@gmail.com); Fax: 091 – 0231 - 2692333

**Electronic supplementary Information**

Many of the synthesized 1,2,3-triazoles are known compounds and their structures were confirmed by comparison of their physicochemical data with the observed one while unknown compounds were characterized by physical as well as spectral methods.

**Spectra of unknown compounds are given below.**

4bb.

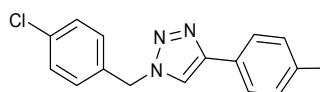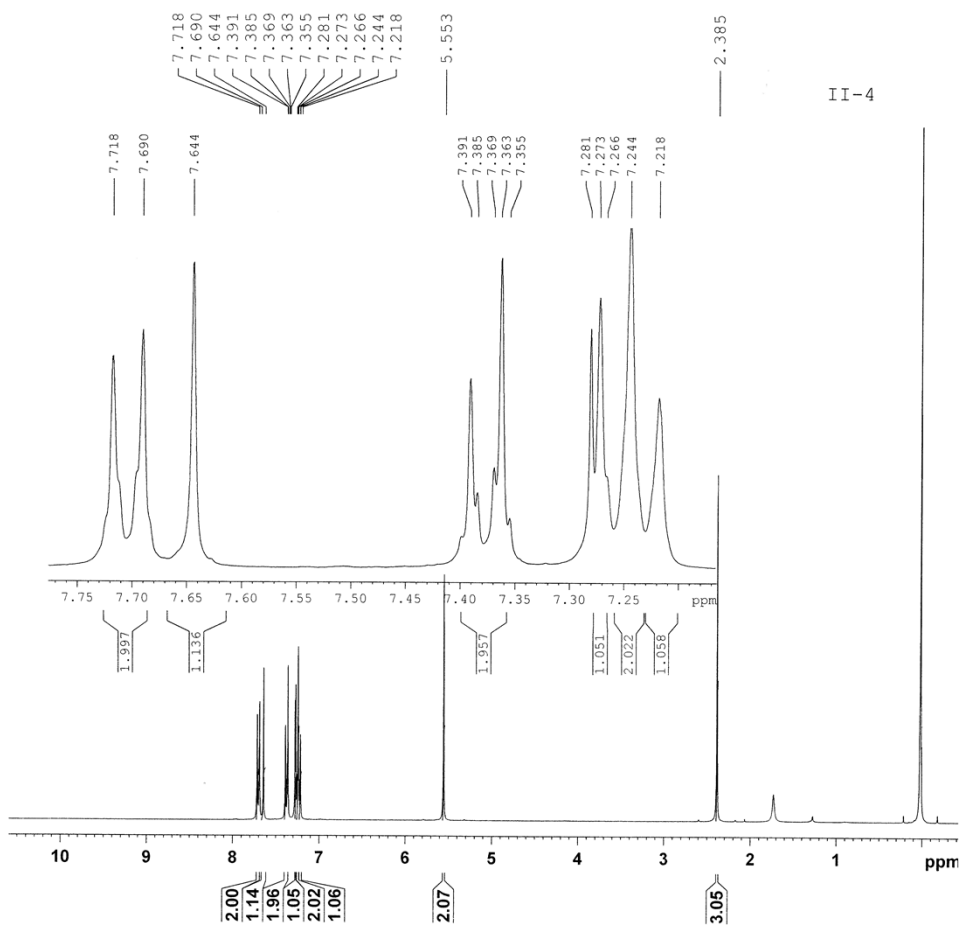

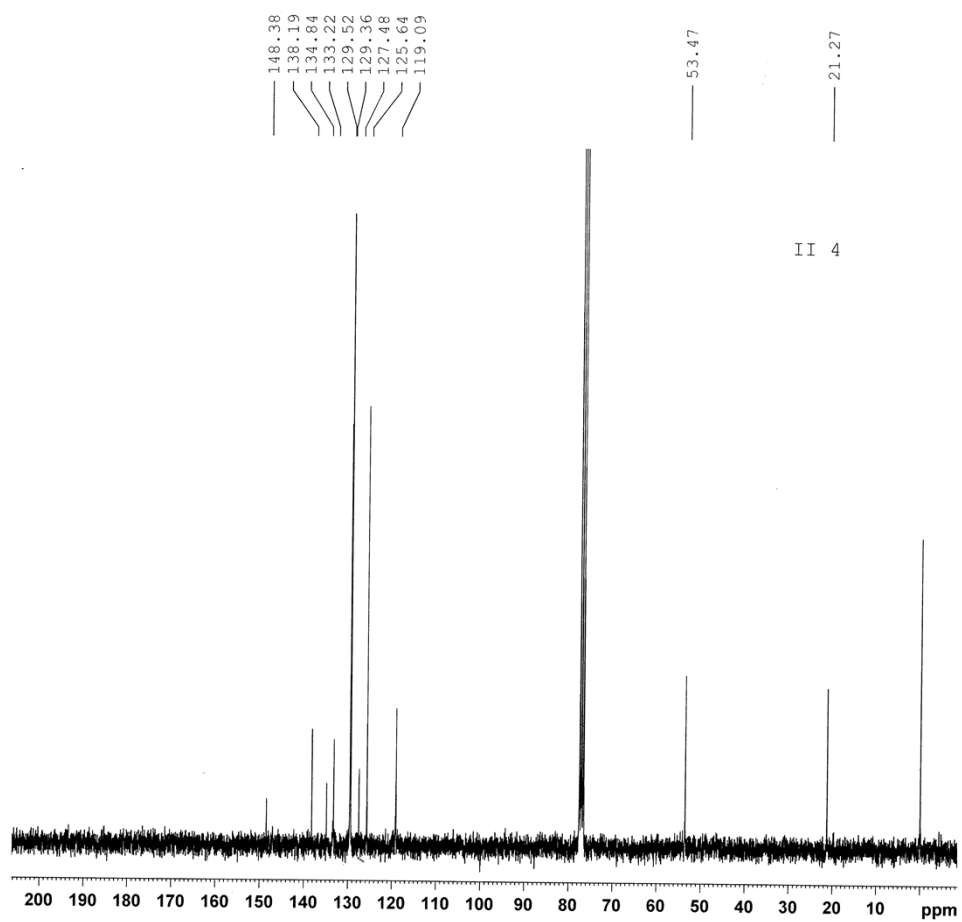

4eb.

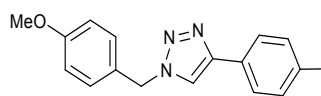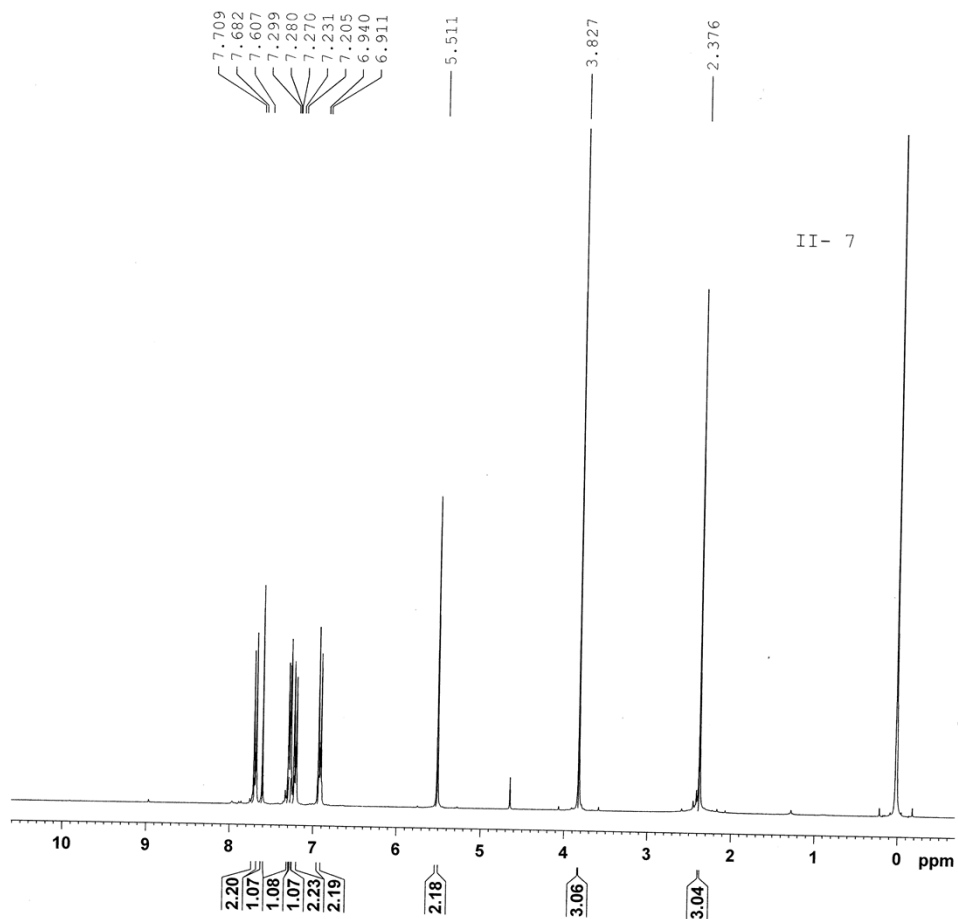

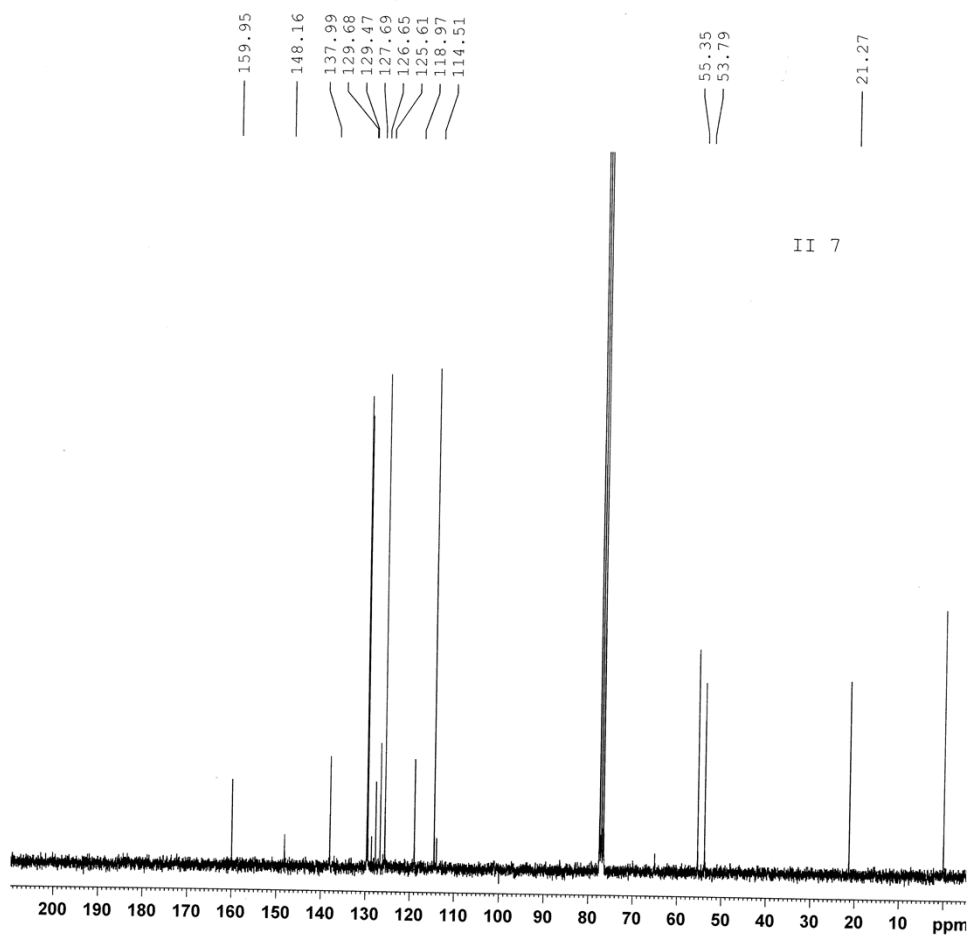

4fb.

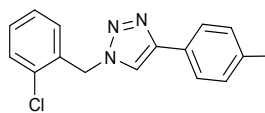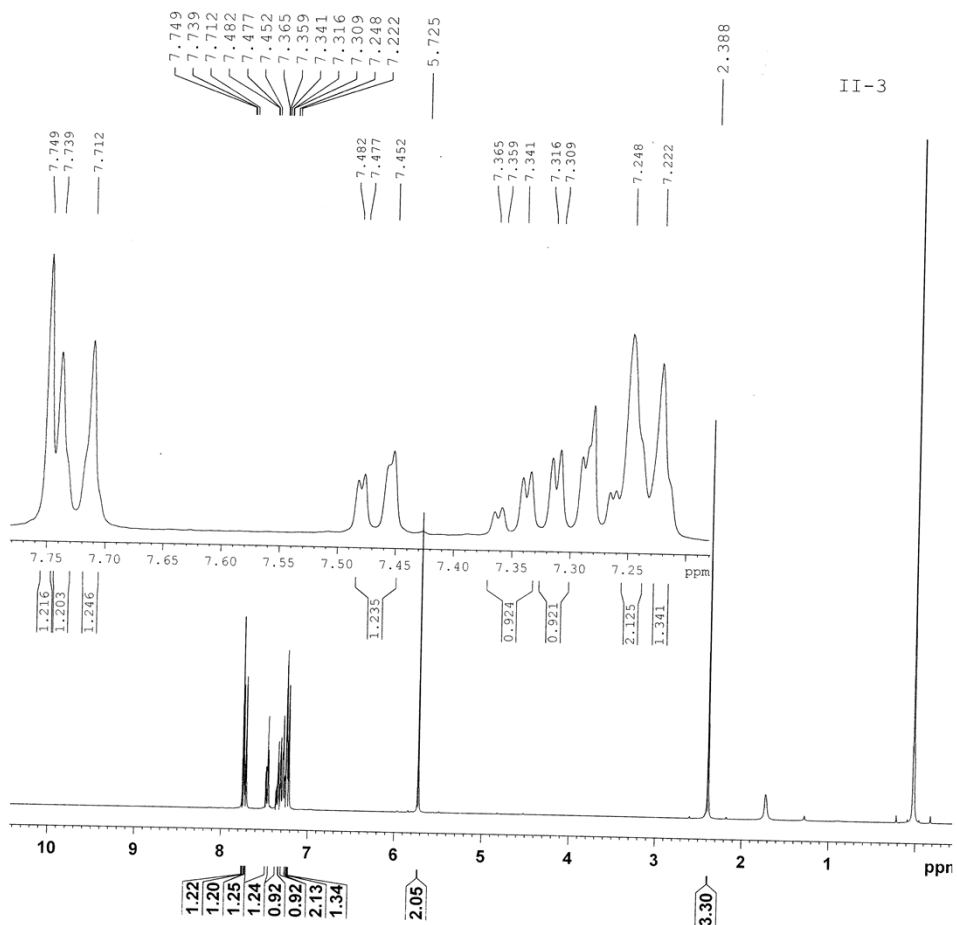

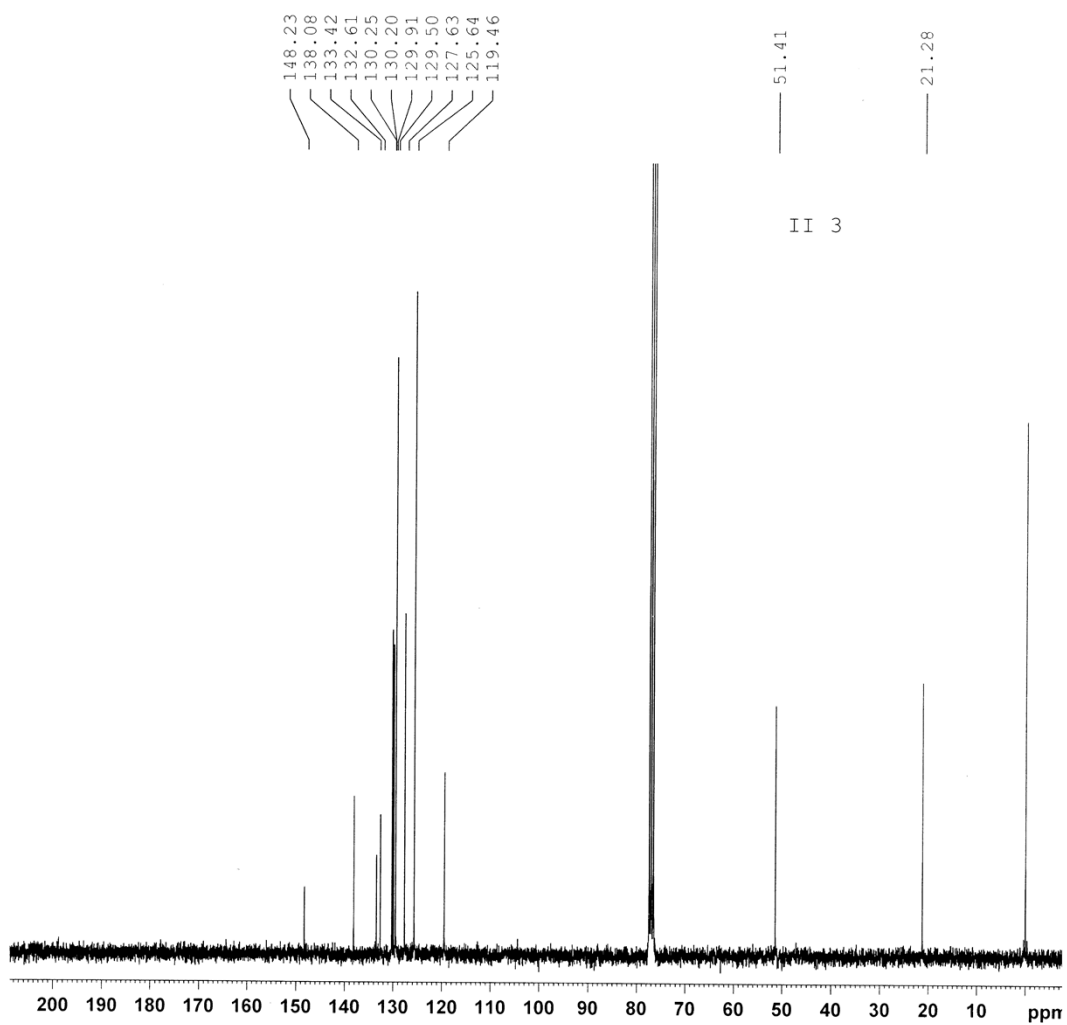

4bc.

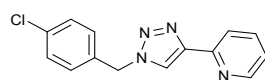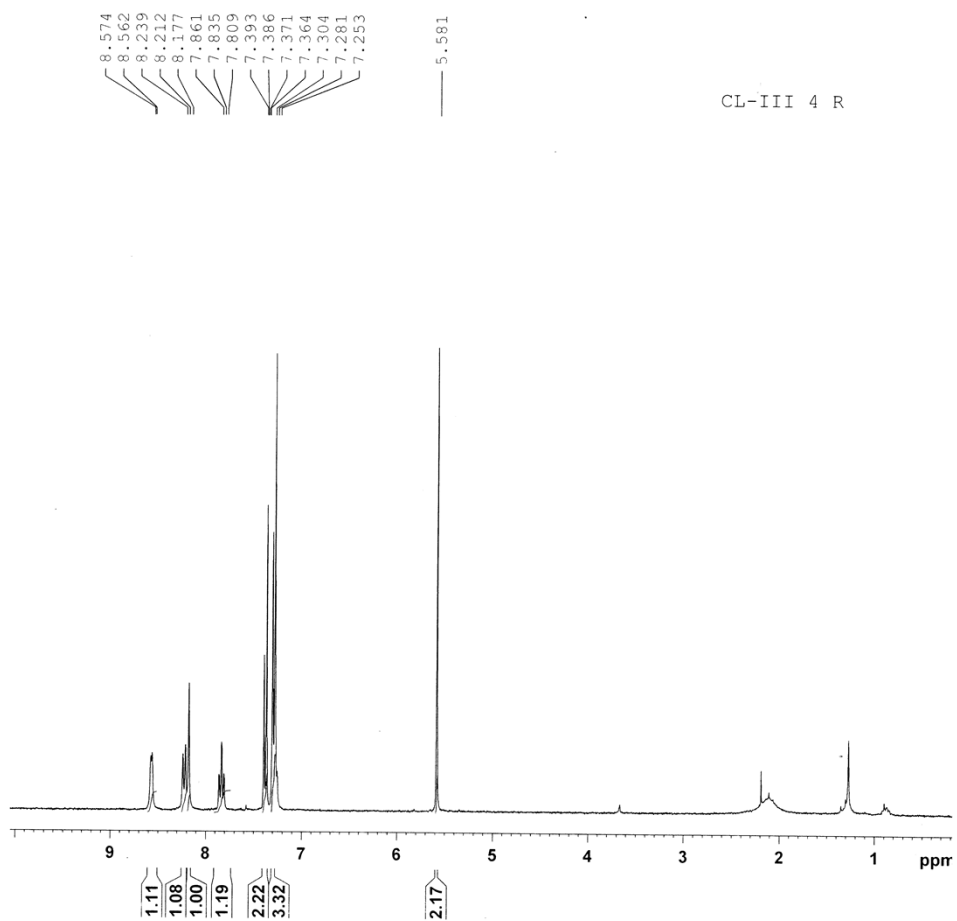



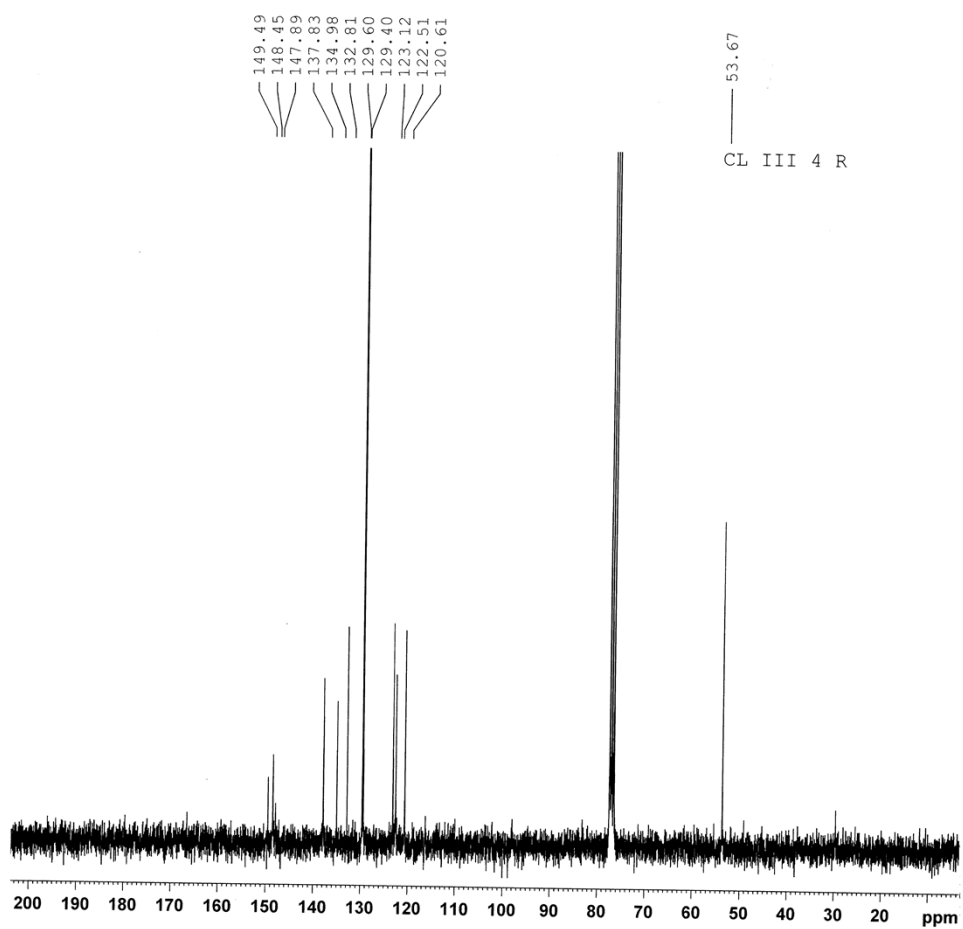

4fc.

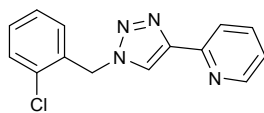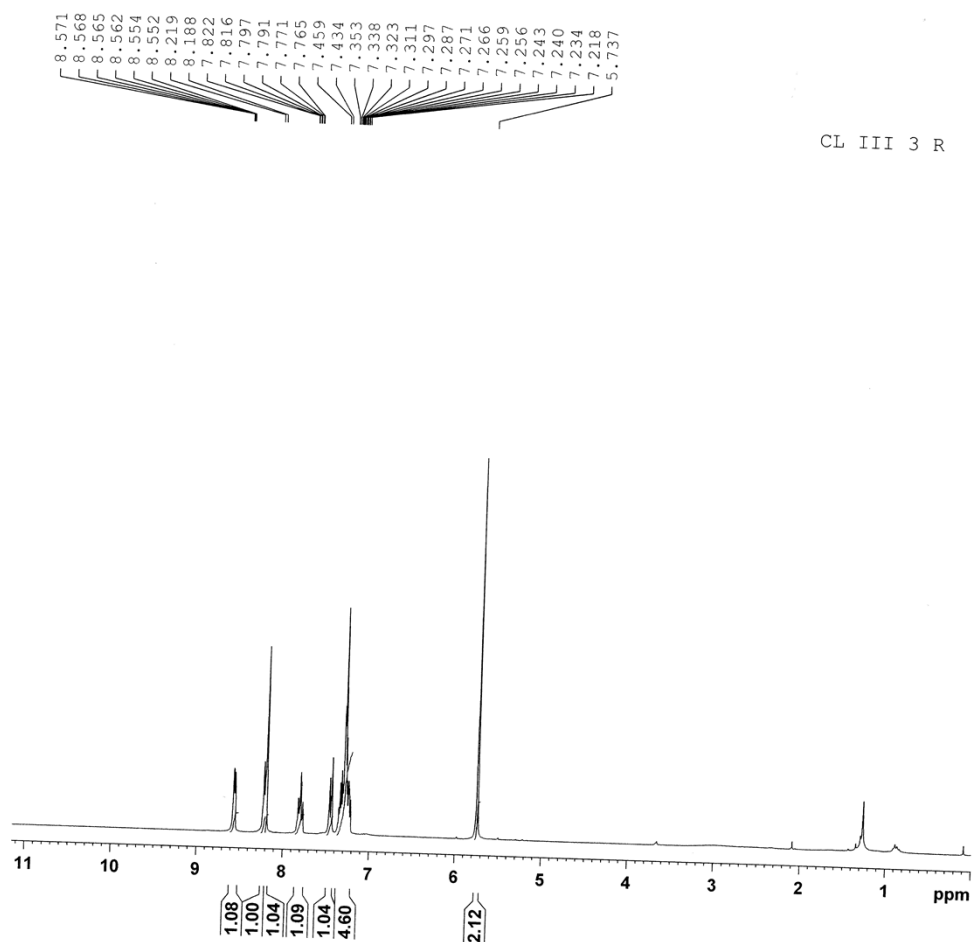

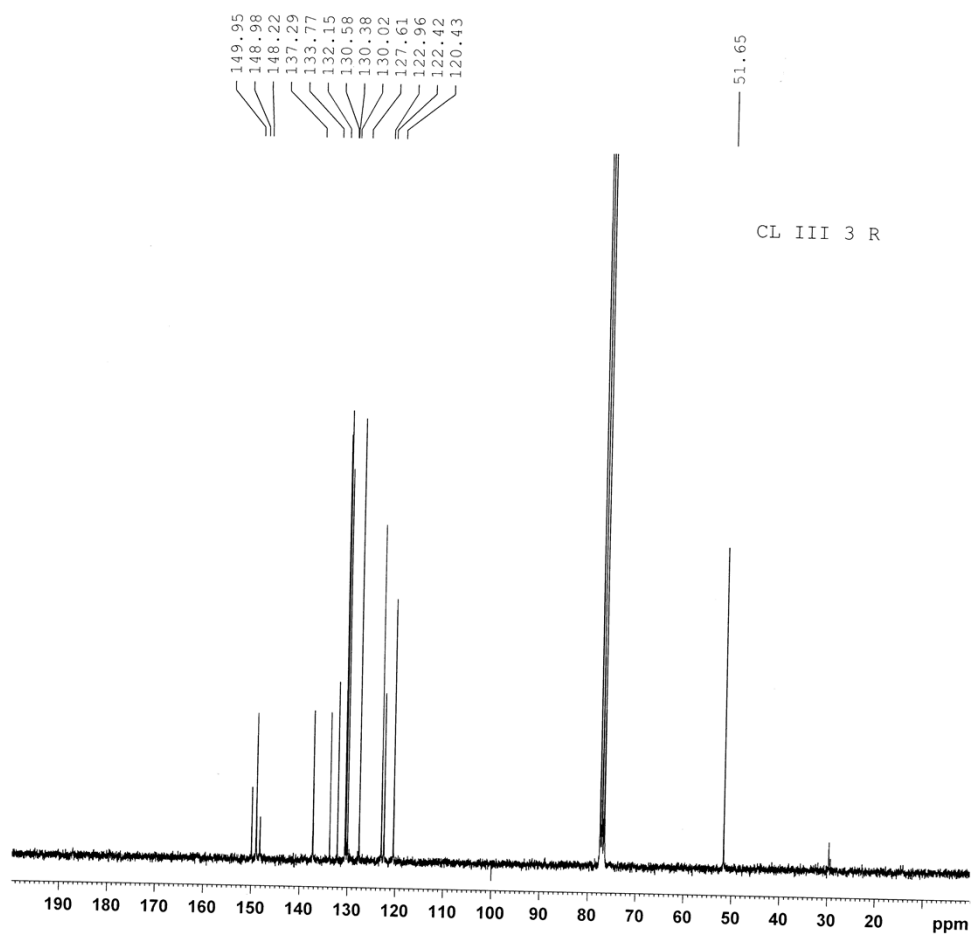

4gc.

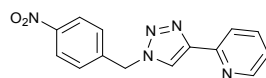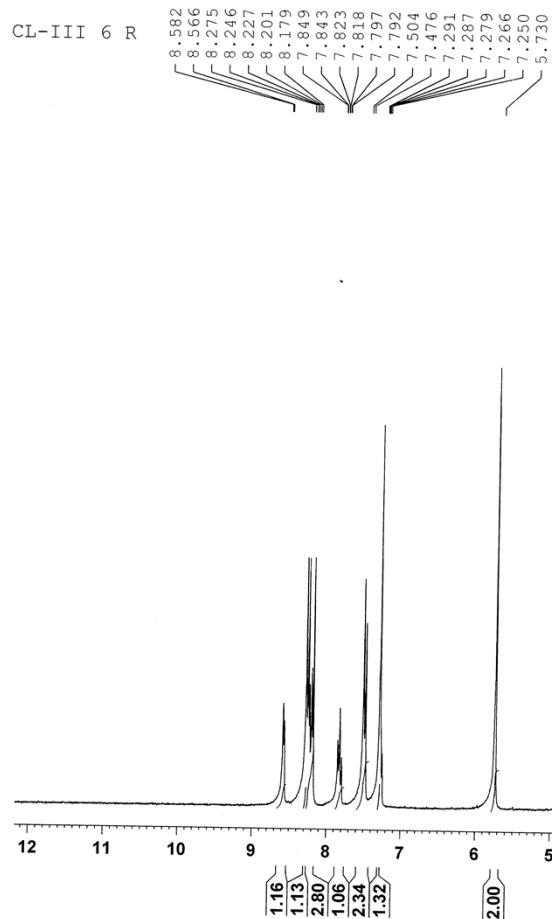

III 6 R

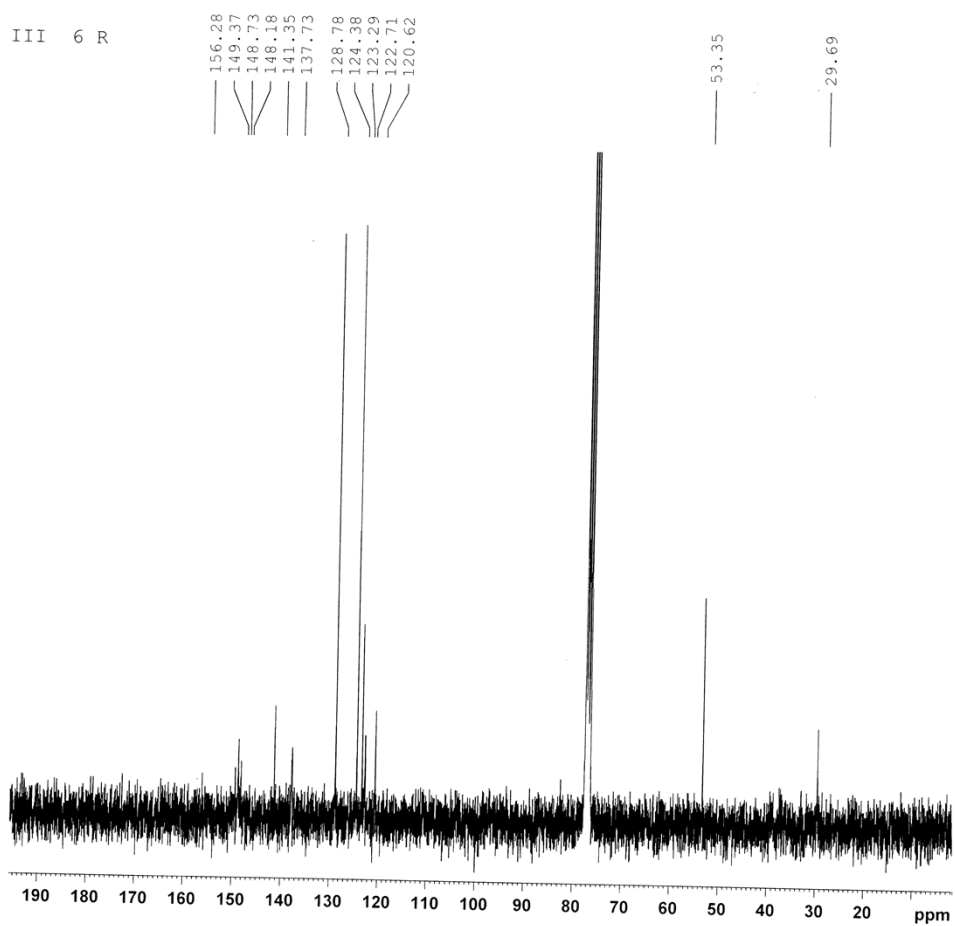

4hc.

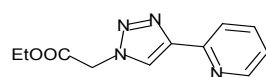

8.625  
8.610  
8.371  
8.249  
8.223  
7.870  
7.844  
7.818  
7.310  
7.280

5.244

4.343  
4.319  
4.295  
4.272

1.352  
1.328  
1.304

CL-III 8 R

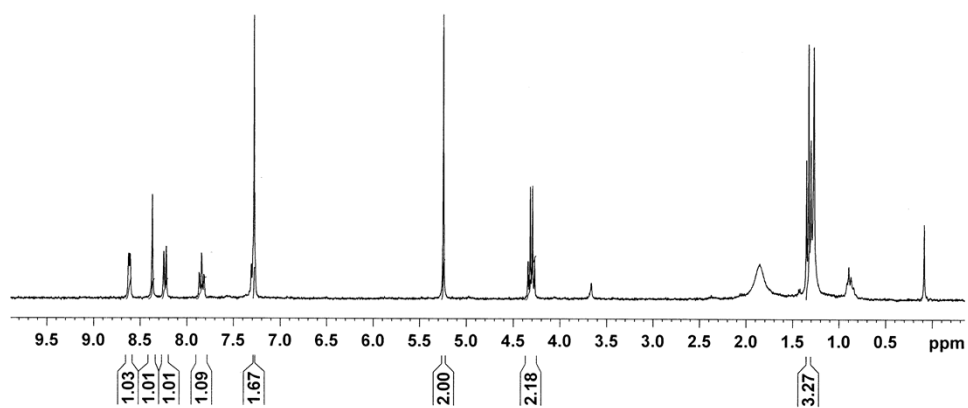

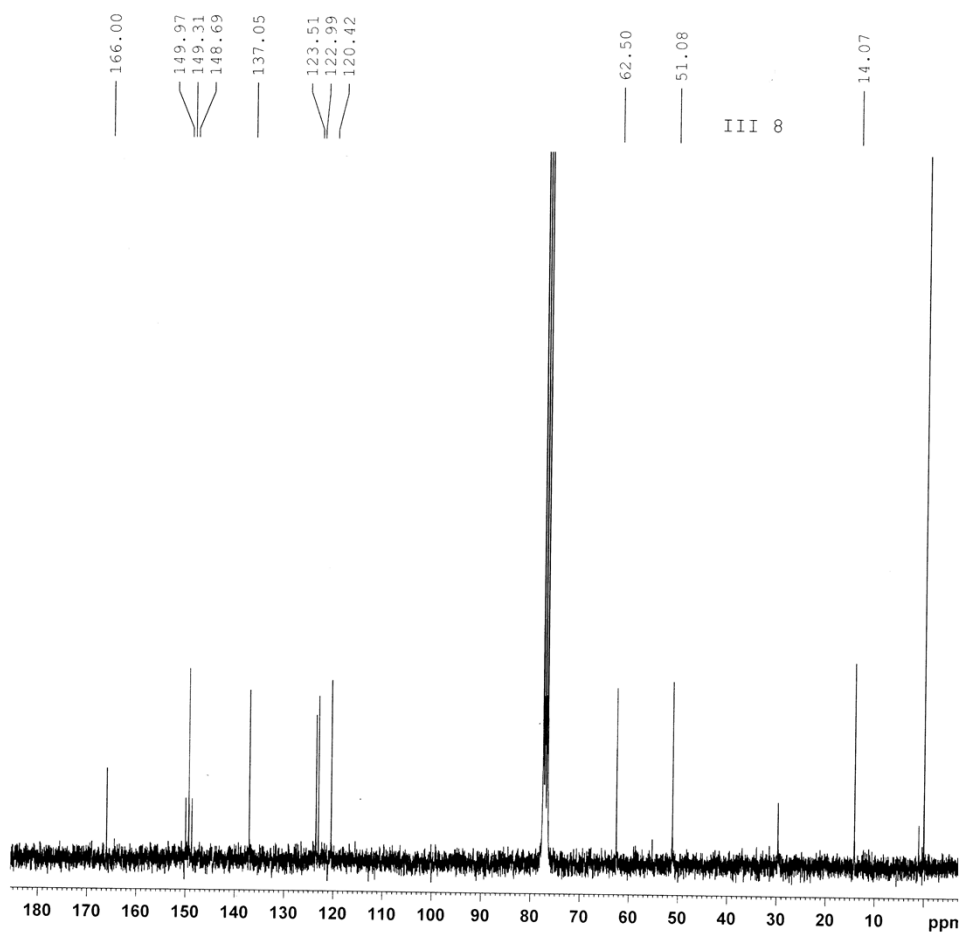

4bd.

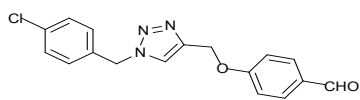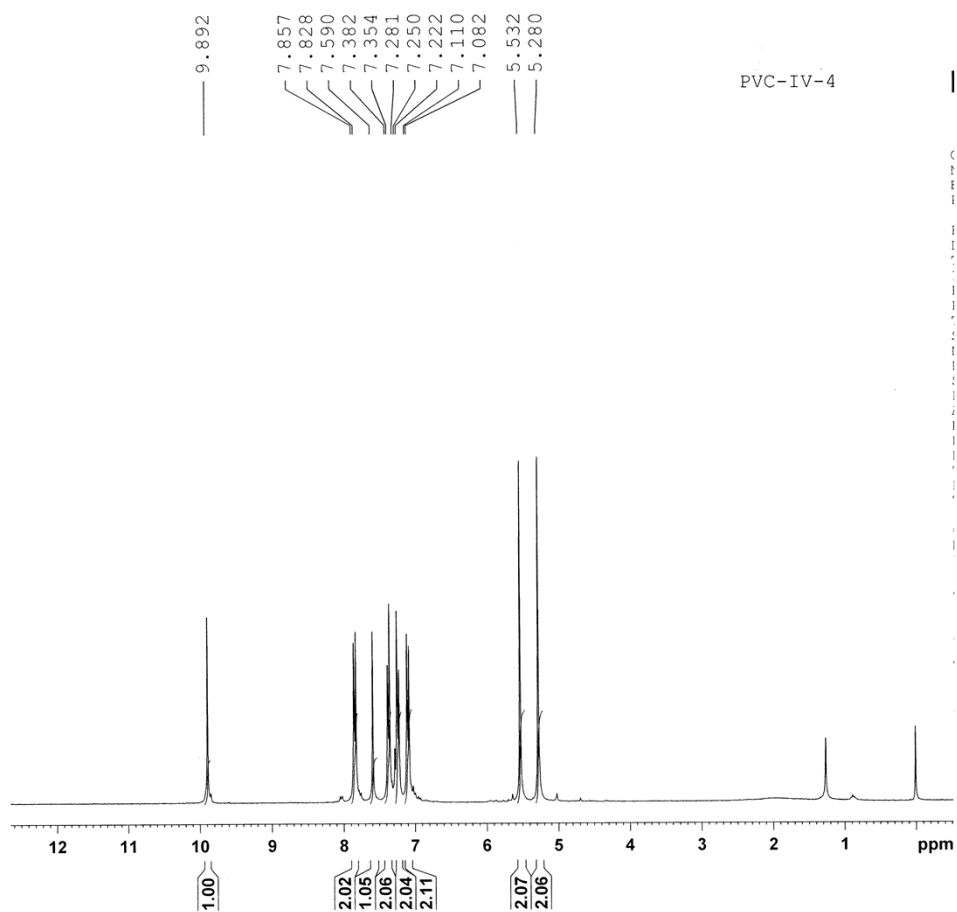



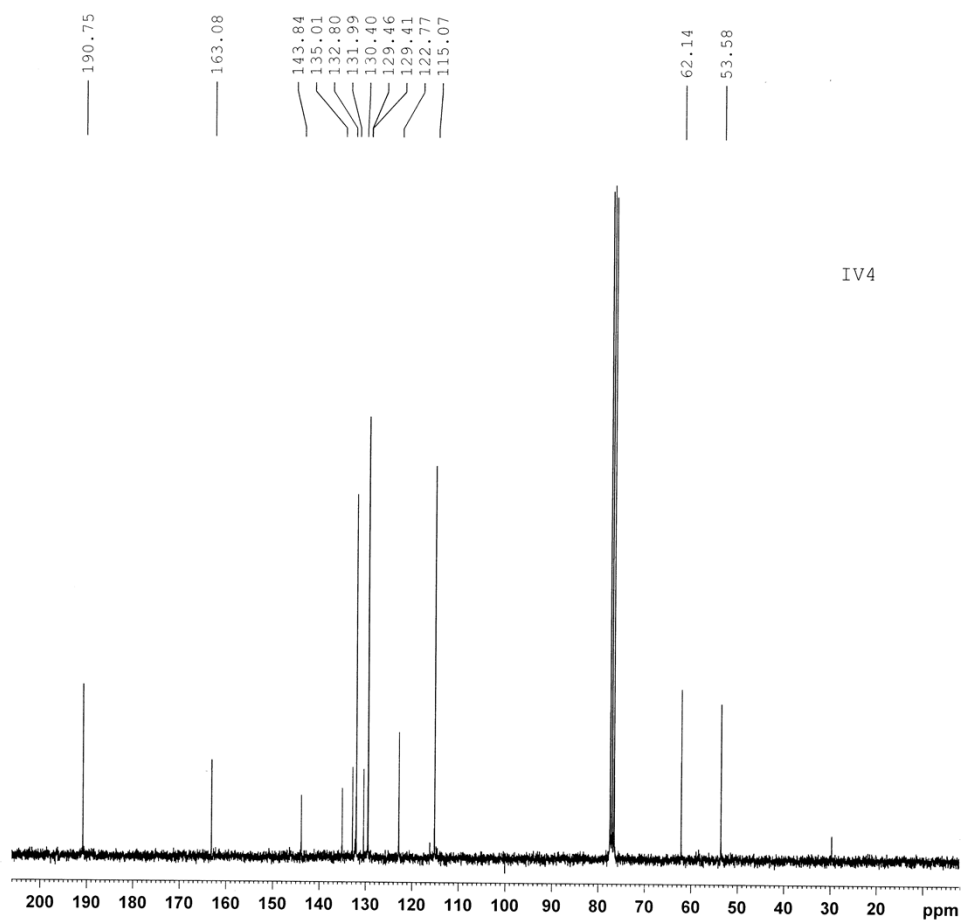

4cd.

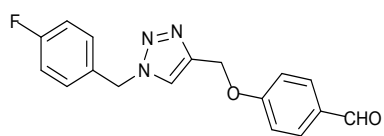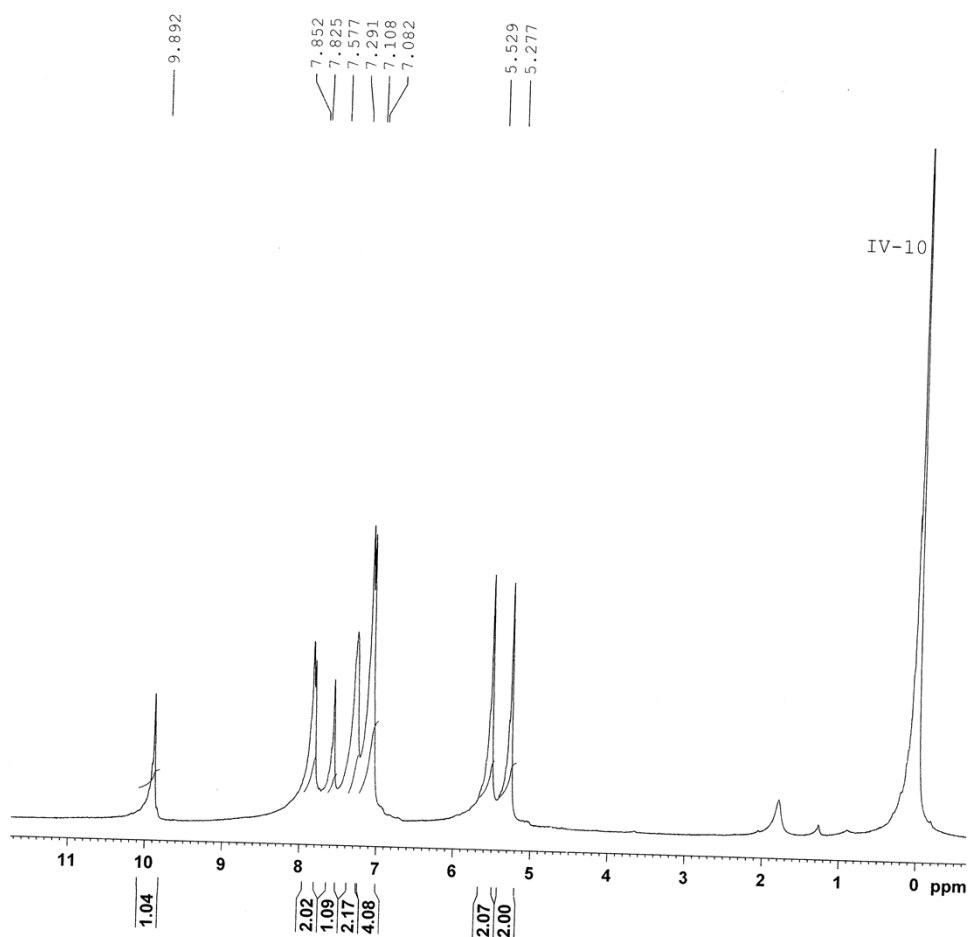

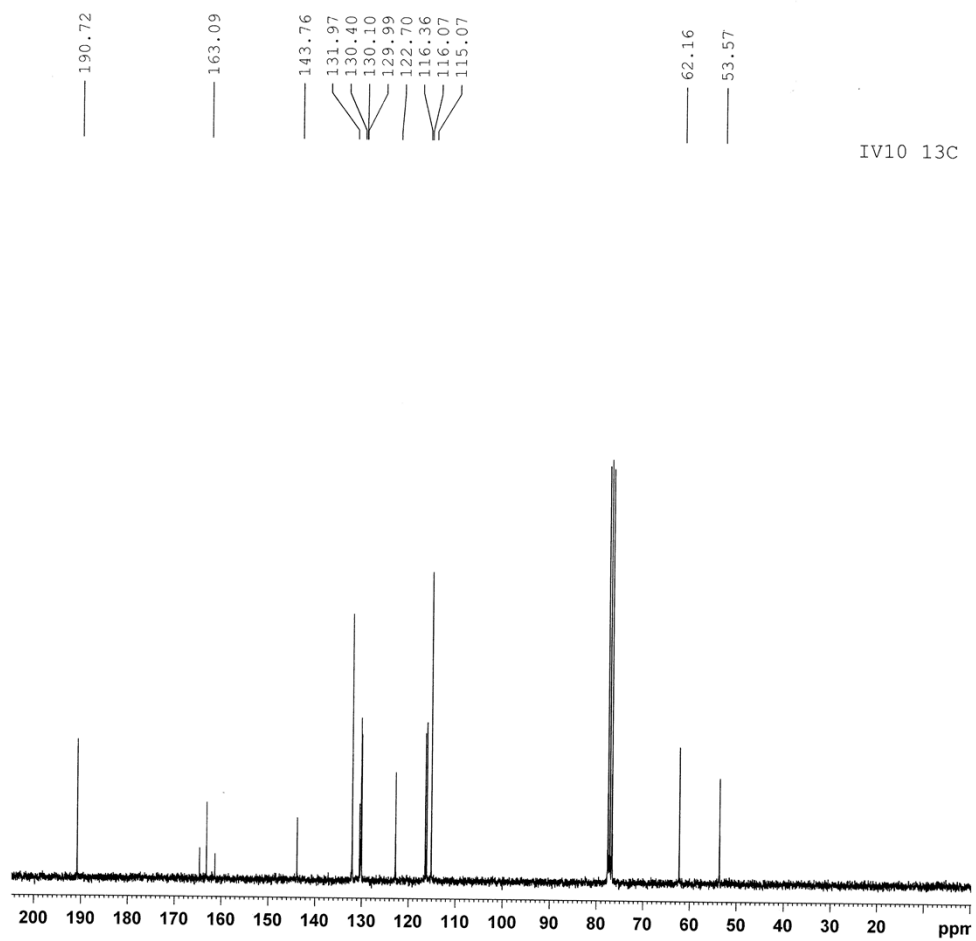

4dd.

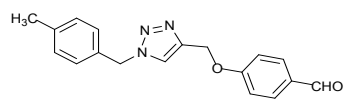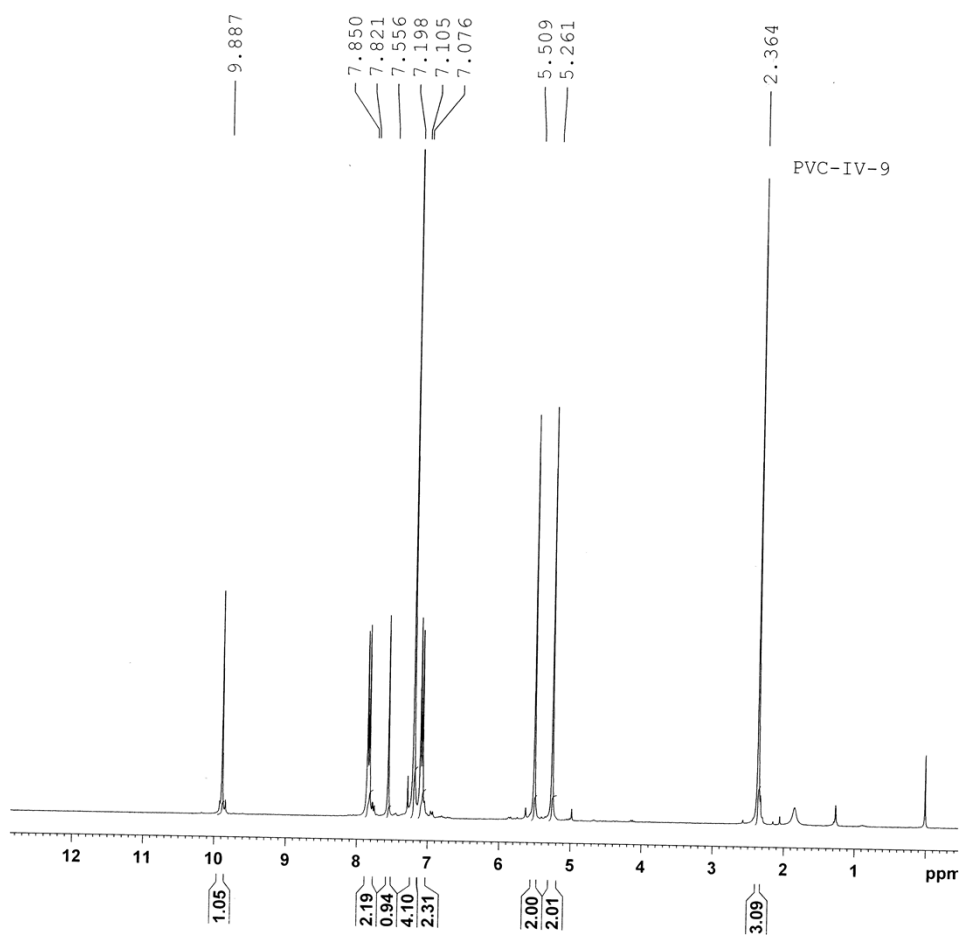

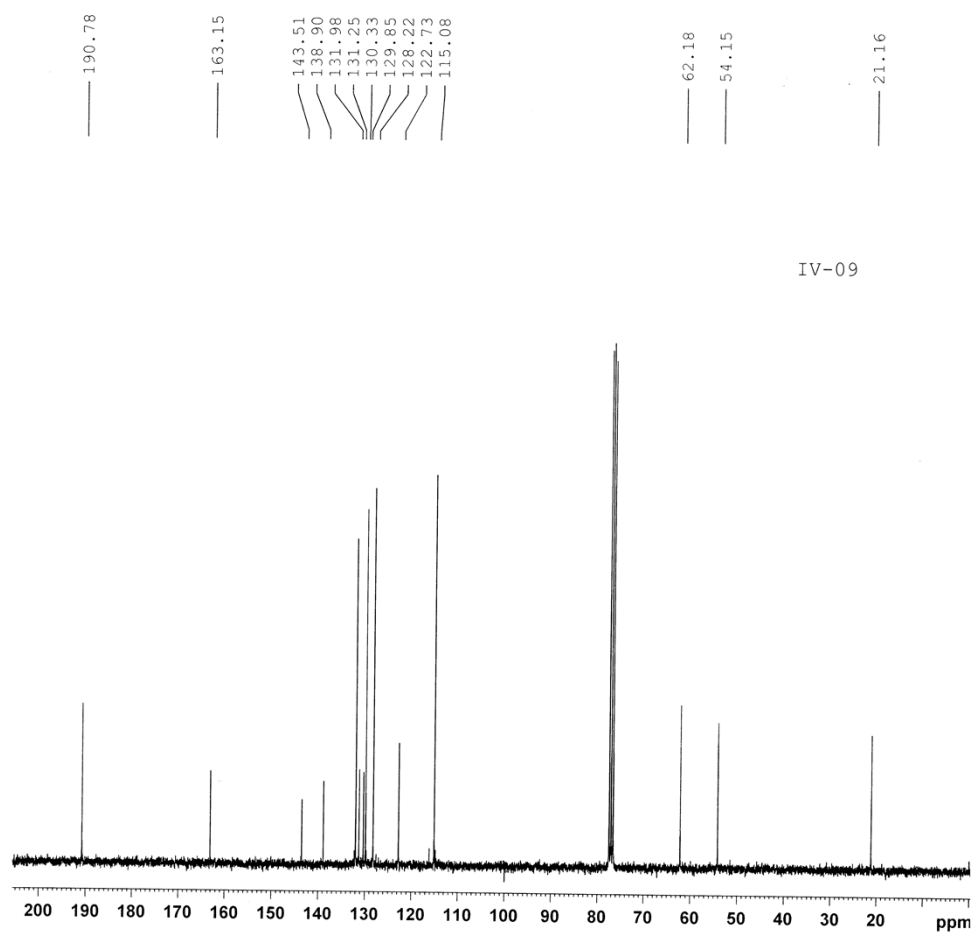

4gd.

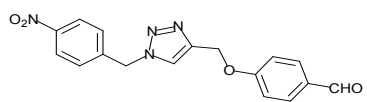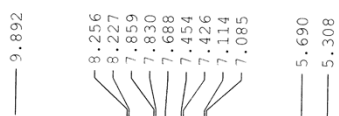

PVC-IV-6

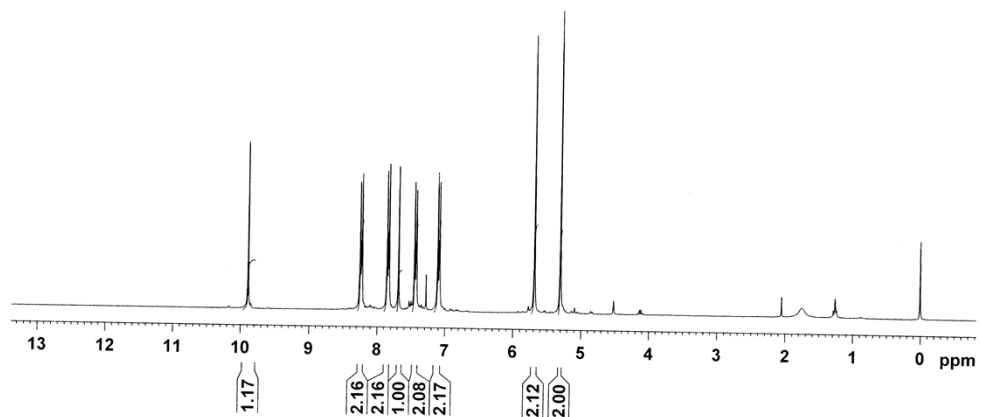

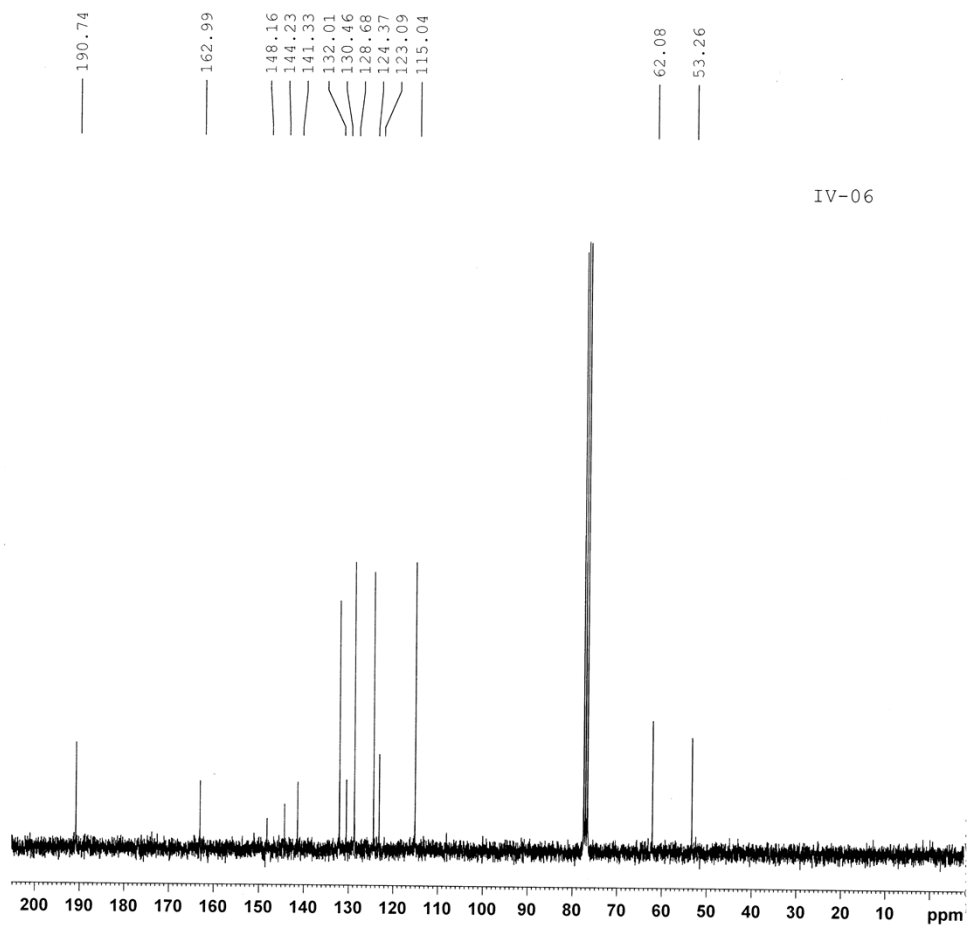

IV-06

4bf.

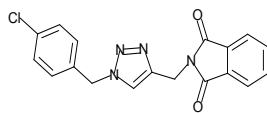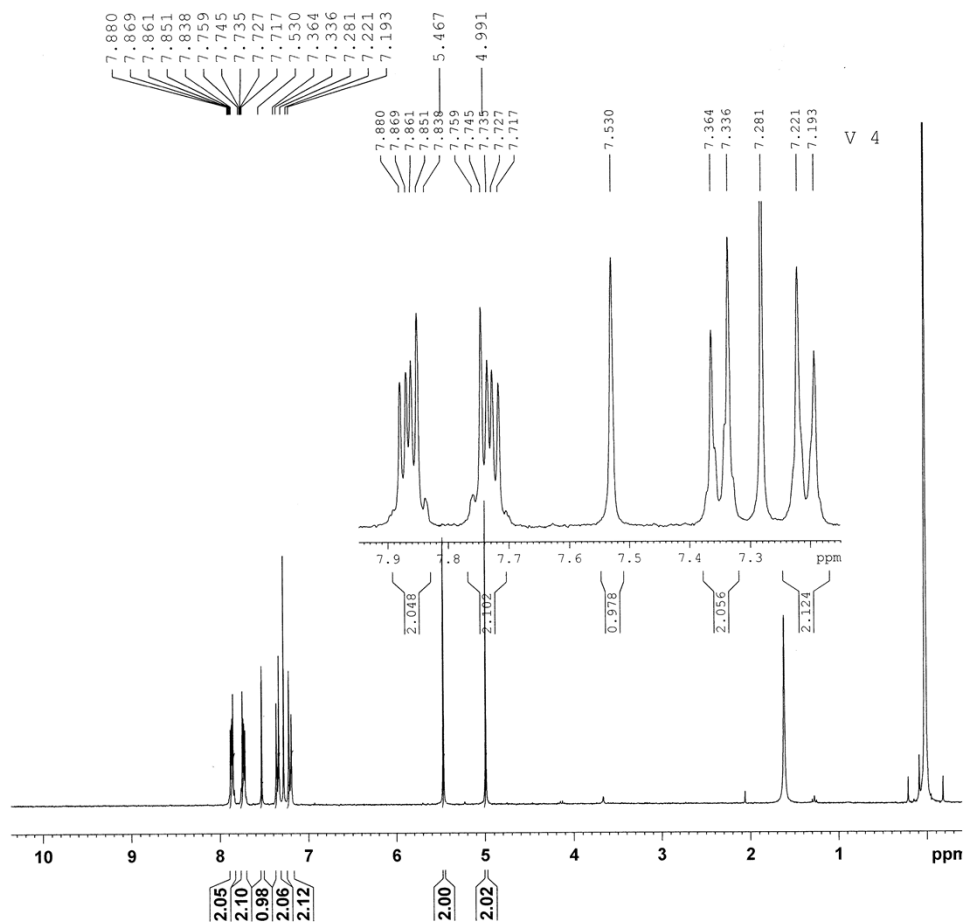



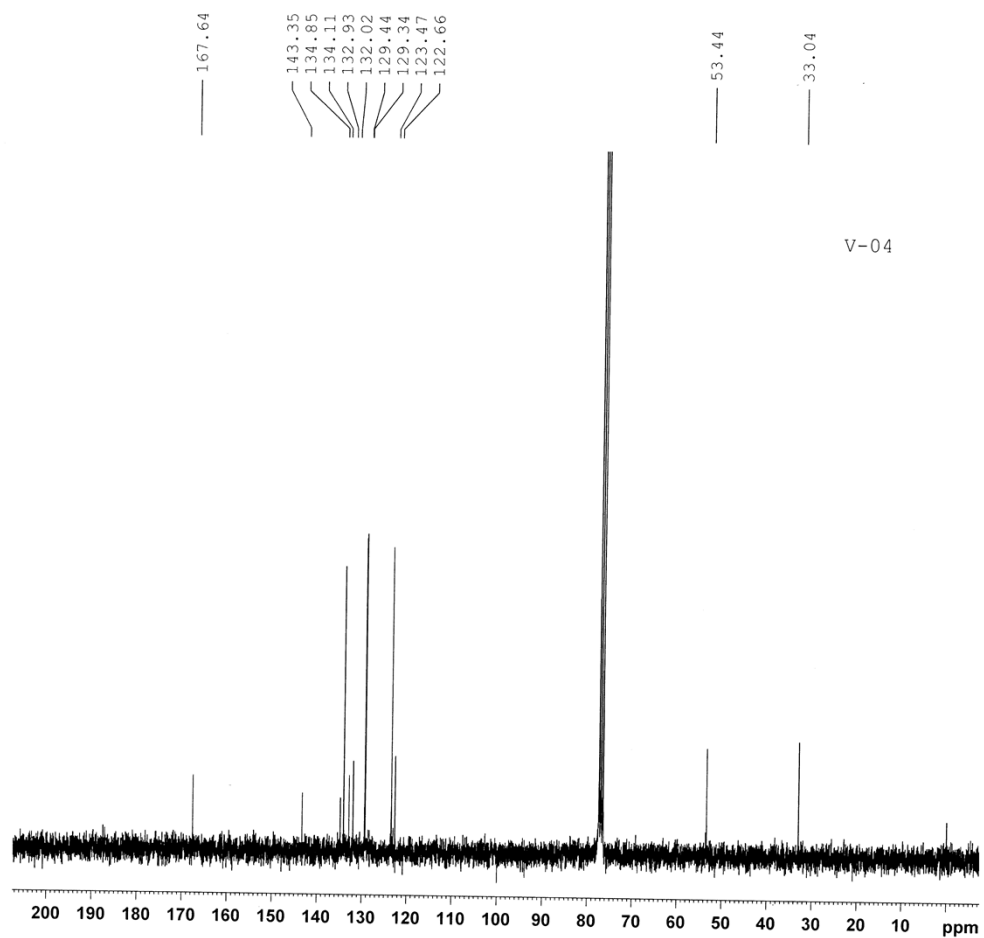

V-04

Fc1ccc(cc1)CN2C=NC3C2C(=N1)C(=O)c4ccccc41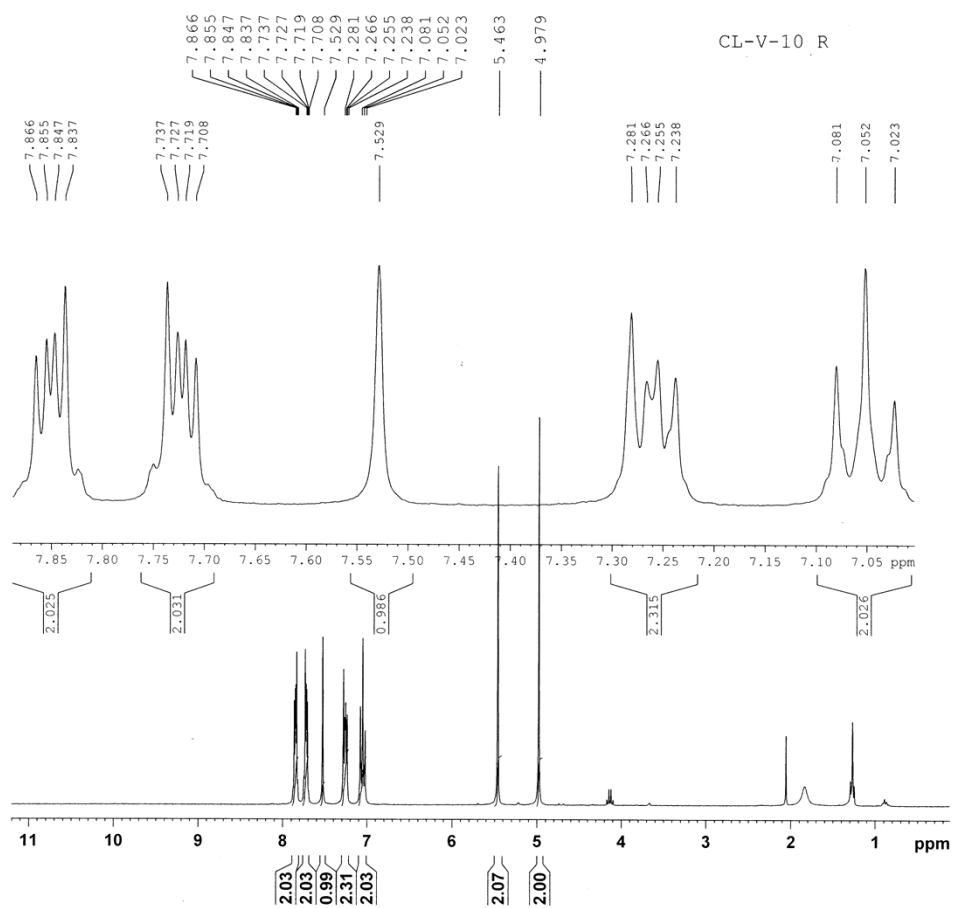

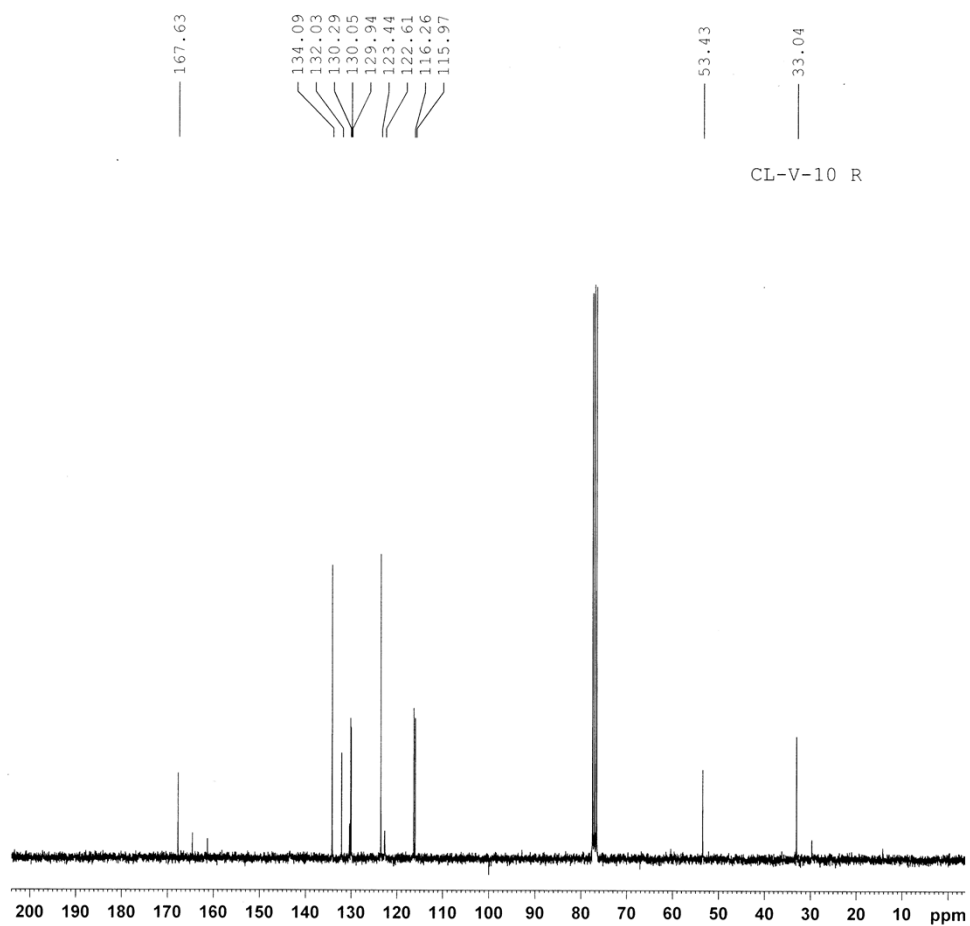

Cc1ccc(cc1)CN2C=NC=C2CN3C(=O)c4ccccc4C3=O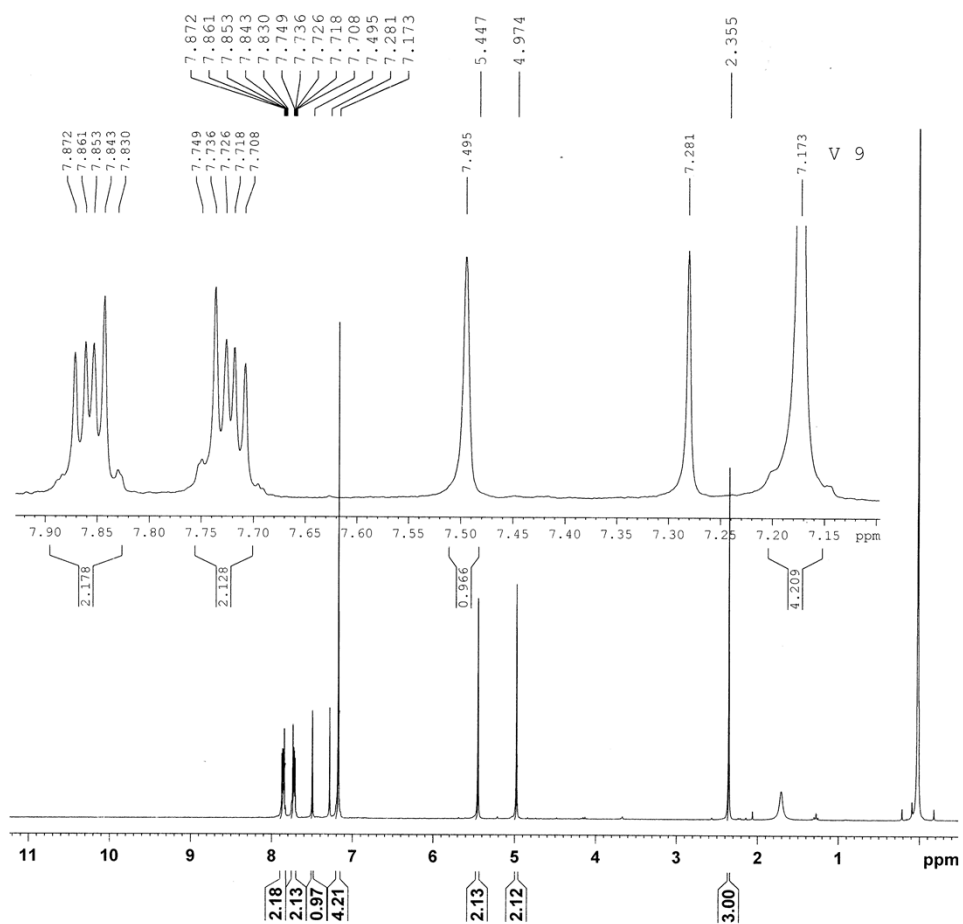

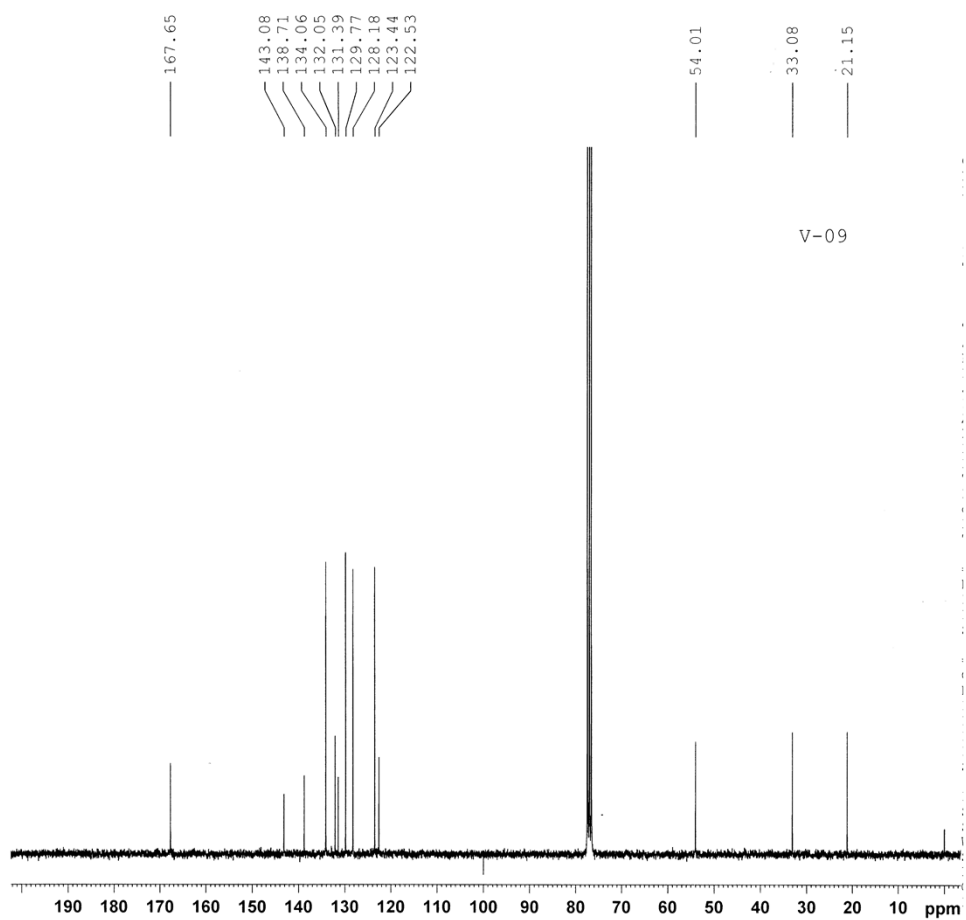

4ff.

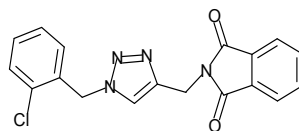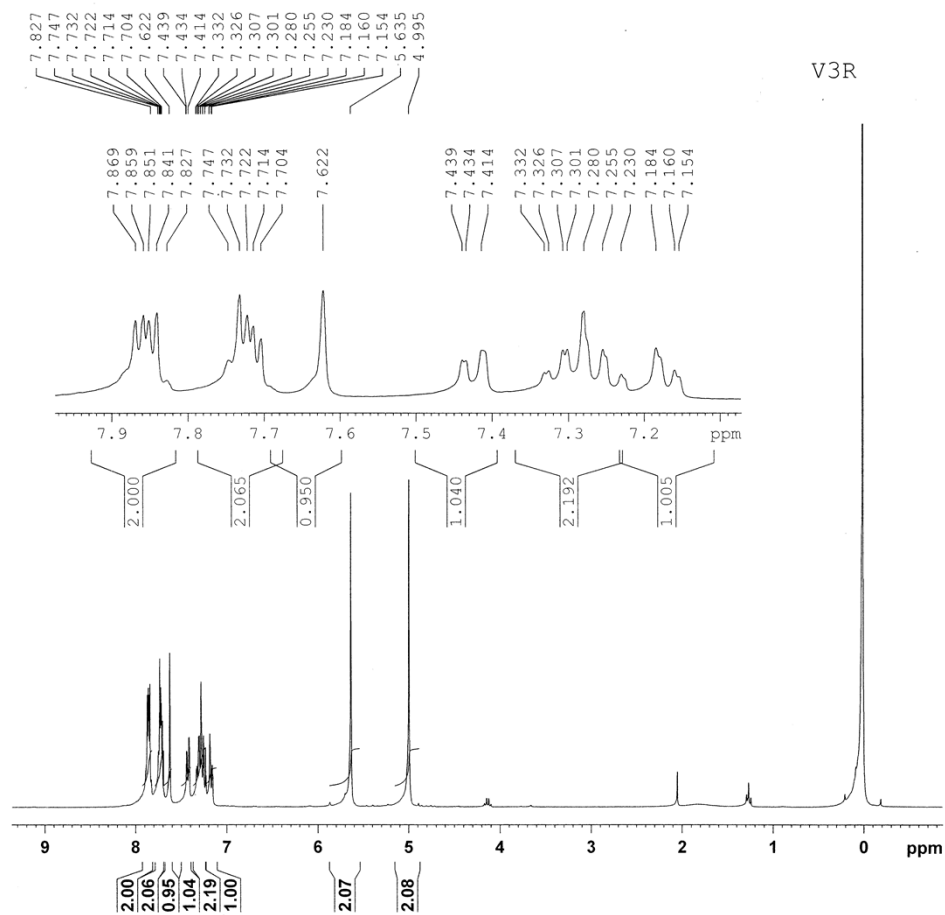

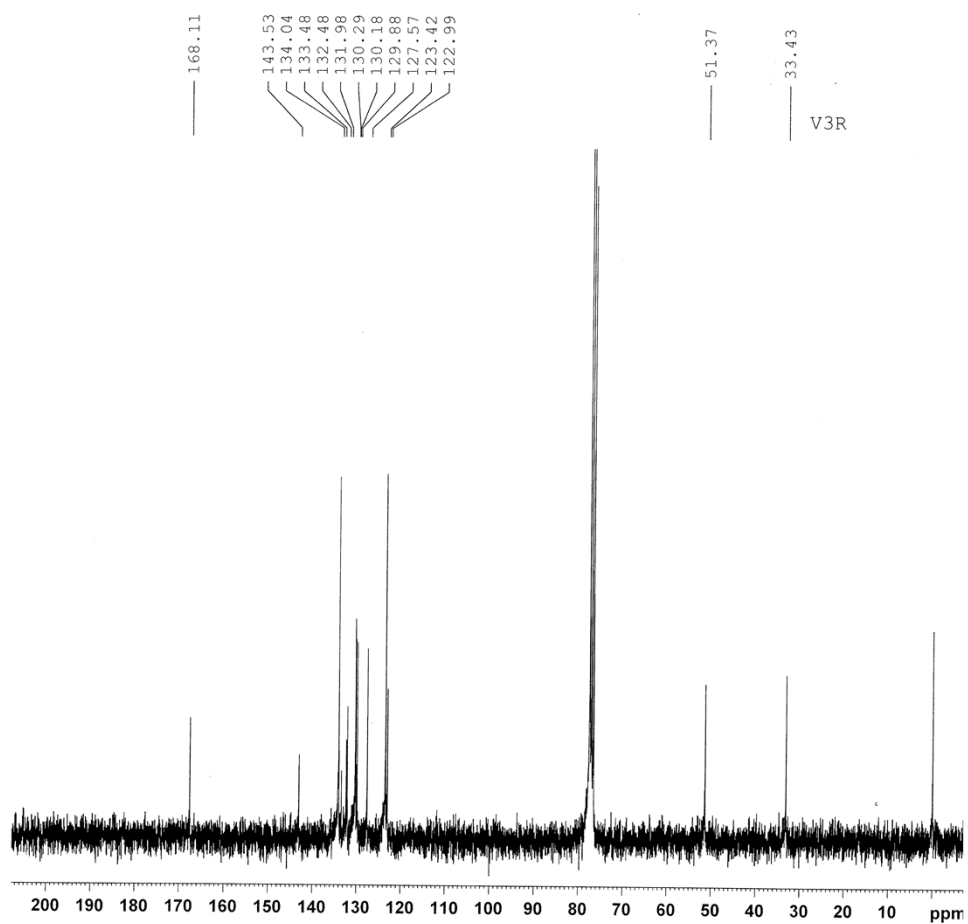

Supplement: c4ra05080k1.pdf [file c4ra05080k1.pdf]
